# Supplementary material for: The Anti-Obesity Effects of Lemon Fermented Products in 3T3-L1 Preadipocytes and in a Rat Model with High-Calorie Diet-Induced Obesity
Source: MDPI journal article supplement (doi:10.3390/nu13082809), 2021-08-16
Supplement: s1 [file s1]

**Supplementary Table S2.** Effect of LFP on body weight relative organ weight in rats fed a high-calorie diet

| <b>Organ</b> | <b>ND</b>                | <b>HD</b>                | <b>HD+LLFP</b>           | <b>HD+MLFP</b>           | <b>HD+HLFP</b>           |
|--------------|--------------------------|--------------------------|--------------------------|--------------------------|--------------------------|
| Heart (g)    | 0.30 ± 0.02 <sup>a</sup> | 0.28 ± 0.02 <sup>a</sup> | 0.30 ± 0.02 <sup>a</sup> | 0.30 ± 0.03 <sup>a</sup> | 0.30 ± 0.03 <sup>a</sup> |
| Liver (g)    | 3.19 ± 0.28 <sup>a</sup> | 3.17 ± 0.28 <sup>a</sup> | 3.17 ± 0.36 <sup>a</sup> | 3.14 ± 0.21 <sup>a</sup> | 3.09 ± 0.20 <sup>a</sup> |
| Spleen(g)    | 0.20 ± 0.03 <sup>a</sup> | 0.17 ± 0.02 <sup>a</sup> | 0.17 ± 0.03 <sup>a</sup> | 0.18 ± 0.05 <sup>a</sup> | 0.17 ± 0.01 <sup>a</sup> |
| Spleen(g)    | 0.20 ± 0.03 <sup>a</sup> | 0.17 ± 0.02 <sup>a</sup> | 0.17 ± 0.03 <sup>a</sup> | 0.18 ± 0.05 <sup>a</sup> | 0.17 ± 0.01 <sup>a</sup> |
| Kidney(g)    | 0.80 ± 0.05 <sup>a</sup> | 0.74 ± 0.03 <sup>a</sup> | 0.73 ± 0.05 <sup>a</sup> | 0.73 ± 0.07 <sup>a</sup> | 0.73 ± 0.07 <sup>a</sup> |

Data are expressed as means ± SD (n=10). Different letters indicate significant differences among each group (P<0.05). Body weight related organ weight (%) is (organ weight/body weight)\*100. The groups are abbreviated as: Normal diet (ND), High calories diet (HD), HD with low dose of LFP (HD+LLFP), HD with medium dose of LFP (HD+MLFP), HD with high dose of LFP (HD+HLFP).
