# Supplementary material for: The Anti-Obesity Effects of Lemon Fermented Products in 3T3-L1 Preadipocytes and in a Rat Model with High-Calorie Diet-Induced Obesity
Source: MDPI journal article supplement (doi:10.3390/nu13082809), 2021-08-16
Supplement: s1 [file s1]

**Supplementary Table S1.** Specific primer of real-time PCR analysis in this study.

| Gene<br>(rat)  | Primer sequence (5'-3')                                  | Reference<br>(NCBI GenBank) |
|----------------|----------------------------------------------------------|-----------------------------|
| $\beta$ -actin | F- AGGCCCTCTGAACCCTAAG<br>R- CAGCCTGGATGGCTACGTACA       | NM031144.3                  |
| PPAR $\gamma$  | F- AAGTTTGAGTTTGCTGTGAAGTTC.A<br>R- CGATGGGCTTCACGTTTCAG | NM001145366.1               |
| C/EBP $\alpha$ | F- CATCGACTTCAGCGCCTACA<br>R- CCGCTTTGTGATTGCTGTTG       | NM013154.2                  |
| SREBP-1c       | F- CGGGACAGCTTAGCCTCTACA<br>R- CGGCCACAAGAAGTAGATCA      | NM001276707.1               |
| HSL            | F-GTCACGCTACATAAAGGCTGCTT<br>R-CAGCCCGATGGAGAGAGTCT      | NM012598.1                  |
| ATGL           | F-GGCCACTGCCATGATGGTA<br>R-GCAGCCACTCCAACAAACG           | NM001108509.2               |
| FAS            | F-TCTCCTGTTGACCCAGAGCAT<br>R-TGGGCCAGAATGGCATCT          | NM017332.1                  |
| AMPK           | F-GTGGATCGCCAAATTATGCA<br>R-AACCTCAGGACCCGCATACA         | NM023991.1                  |

F: Forward primer. R: Reverse primer.
